# Supplementary material for: A 2D Te/Mxene Schottky junction for a self-powered broadband photodetector with high polarization-sensitive imaging
Source: Royal Society of Chemistry journal article supplement (doi:10.1039/d4tc05204h), 2025-01-01
Supplement: d4tc05204h1.pdf [file d4tc05204h1.pdf]

## Supporting Information

### **2D Te/Mxene Schottky Junction for Self-Powered Broadband**

### **Photodetector With High Polarization-Sensitive Imaging**

Pingping Yu,<sup>a</sup> Yuqing Kong,<sup>a</sup> Xiaotian Yu,<sup>a</sup> Xi Wan,<sup>a</sup> Fa Cao <sup>\*b</sup> and Yanfeng Jiang <sup>\*a</sup>

<sup>a</sup> School of Integrated Circuits, Jiangnan University, Wuxi 214122, China;

<sup>b</sup> State Key Laboratory of Organic Electronics and Information Displays, Institute of Advanced Materials (IAM), School of Material Science and Engineering, Nanjing University of Posts and Telecommunication (NJUPT), Nanjing 210023, PR China.

E-mail: pingpingyu@jiangnan.edu.cn; iamfcao@njupt.edu.cn;

jiangyf@jiangnan.edu.cn

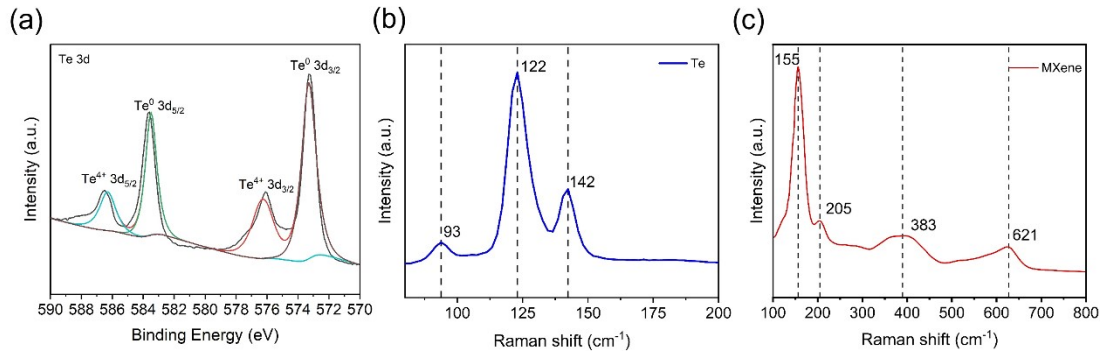

**Fig. S1** Material characterizations of the Te/MXene heterojunction device. XPS spectra of Te NTs (a). Raman spectra of the Te (b) and MXene (c).

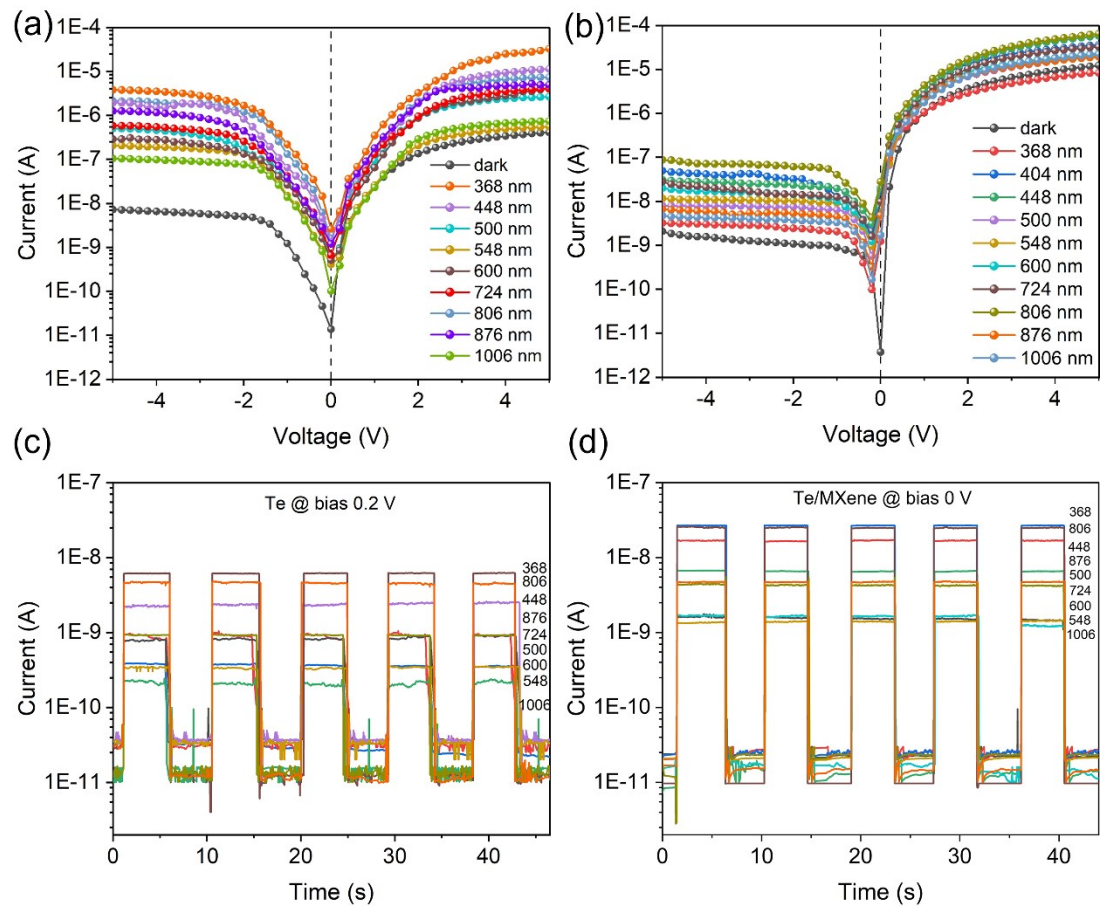

**Fig. S2** Real-time photoresponse characteristics of the Te (c) and Te/MXene (d) device under the illumination of light at 0 V bias with various wavelengths.

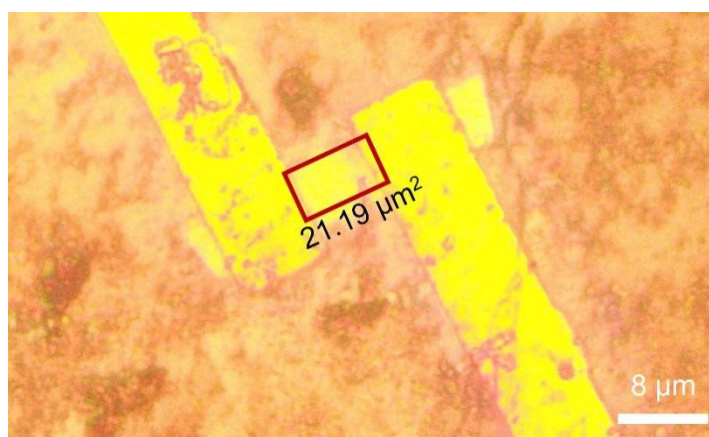

**Fig. S3** Schematic representation of the actual light area of the heterojunction

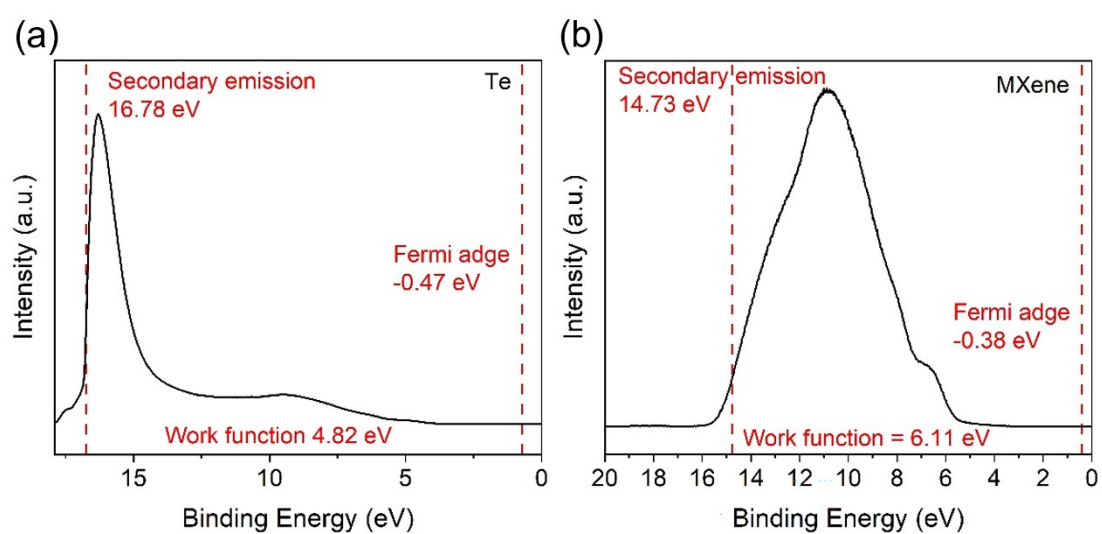

**Fig. S4** UPS spectra for the pristine Te(a) and MXene(b).

**Table S1** The light intensity at different wavelength.

| Wavelength<br>(nm) | Light Intensity (mW cm <sup>-2</sup> ) |
|--------------------|----------------------------------------|
| 368                | 1.32                                   |
| 448                | 1.24                                   |
| 500                | 1.14                                   |
| 548                | 0.93                                   |
| 600                | 0.83                                   |
| 724                | 0.79                                   |
| 806                | 0.69                                   |
| 876                | 0.73                                   |
| 1006               | 0.71                                   |
